# Supplementary material for: Thermally stable luminescence and structure evolution of (K, Rb)BaPO4:Eu2+ solid-solution phosphors
Source: Royal Society of Chemistry journal article supplement (doi:10.1039/c4tc00488d), 2014-01-01
Supplement: c4tc00488d1.pdf [file c4tc00488d1.pdf]

## Supporting Information

### **Thermal Stable Luminescence and Structure Evolution of (K,Rb)BaPO<sub>4</sub>:Eu<sup>2+</sup> Solid-Solution Phosphors**

Chenglong Zhao<sup>1</sup>, Zhiguo Xia<sup>2\*</sup>, Shixin Yu<sup>1</sup>

*<sup>1</sup>School of Materials Sciences and Technology, China University of Geosciences, Beijing  
100083, China*

*<sup>2</sup>School of Materials Sciences and Engineering, University of Science and Technology  
Beijing, Beijing 100083, China*

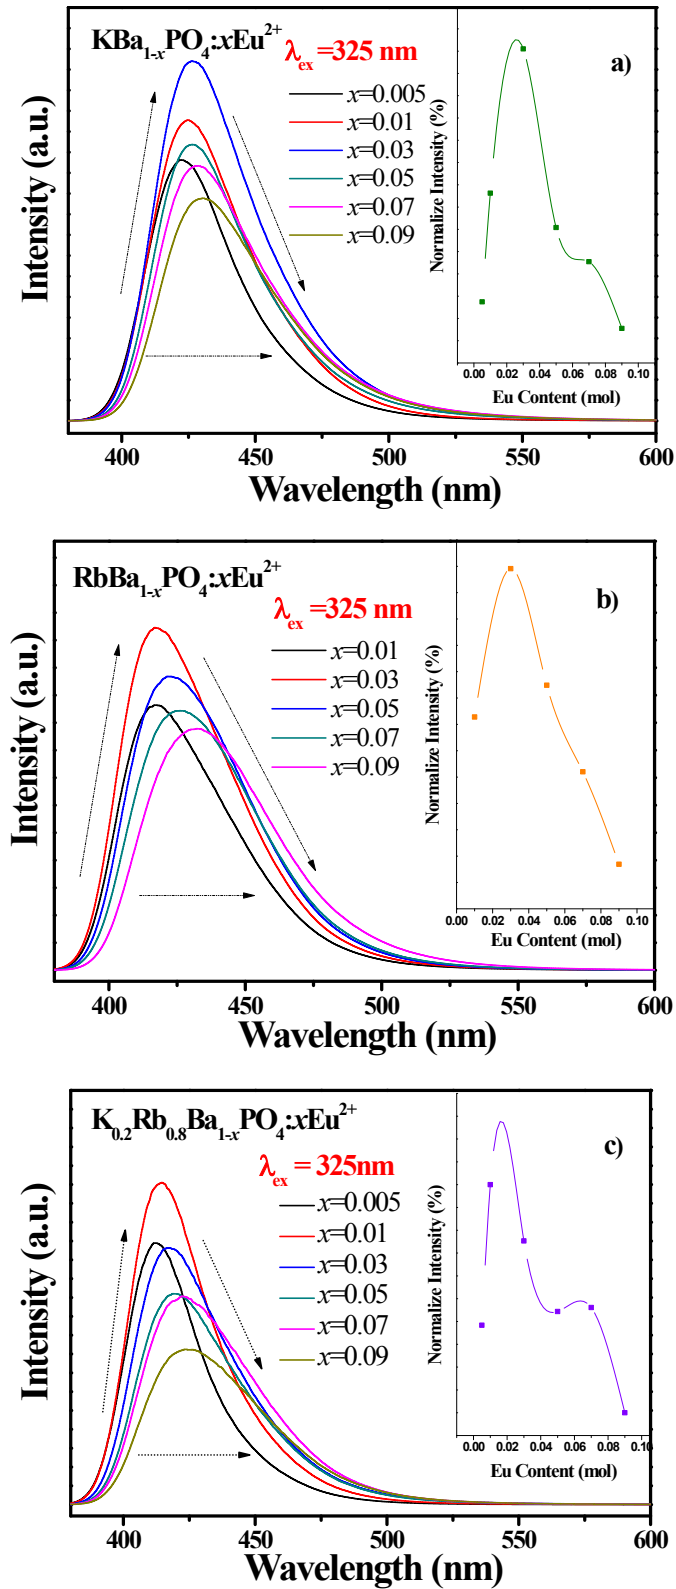

**Fig. S1.** PL spectra of the a)  $\text{KBa}_{1-x}\text{PO}_4:x\text{Eu}^{2+}$ , b)  $\text{RbBa}_{1-x}\text{PO}_4:x\text{Eu}^{2+}$ , c)  $\text{K}_{0.2}\text{Rb}_{0.8}\text{Ba}_{1-x}\text{PO}_4:x\text{Eu}^{2+}$  phosphors and the inset shows the Eu content dependent PL intensity.
